# Supplementary material for: Reverse shoulder arthroplasty versus hemiarthroplasty versus non-surgical treatment for older adults with acute 3- or 4-part fractures of the proximal humerus: study protocol for a randomised controlled trial (PROFHER-2: PROximal Fracture of Humerus Evaluation by Randomisation – Trial Number 2)
Source: Springer Nature journal article supplement (doi:10.1186/s13063-023-07259-3), 2023-04-13
Supplement: 13063_2023_7259_MOESM3_ESM.pdf [file 13063_2023_7259_MOESM3_ESM.pdf]

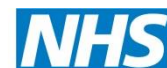

**Health Research Authority**  
**North East – Tyne & Wear South Research Ethics Committee**

HRA Newcastle  
Newcastle Blood Donor Centre  
Holland Drive  
Newcastle upon Tyne  
NE2 4NQ

Telephone: 0207 1048084

**Please note: This is the favourable opinion of the REC only and does not allow you to start your study at NHS sites in England until you receive HRA Approval**

15 May 2018

Professor Amar Rangan  
Consultant Orthopaedic Surgeon  
South Tees Hospitals NHS Foundation Trust  
Department of Trauma and Orthopaedics  
The James Cook University Hospital  
Marton Road, Middlesbrough  
TS4 3BW

Dear Professor Rangan

**Study title:** **A three-arm randomised controlled trial to assess the effectiveness and cost-effectiveness of reverse shoulder arthroplasty versus hemiarthroplasty versus non-surgical care for acute three and four- part fractures of the proximal humerus in patients over 65 years of age – Proximal Fracture Of the Humerus: Evaluation by Randomisation trial No.2 (PROFHER-2).**

**REC reference:** **18/NE/0125**  
**IRAS project ID:** **238346**

Thank you for your notification of 8 May 2018. I can confirm the REC has received the documents listed below and that these comply with the approval conditions detailed in our letter dated 2 May 2018

#### **Documents received**

The documents received were as follows:

| <i>Document</i>                                       | <i>Version</i> | <i>Date</i> |
|-------------------------------------------------------|----------------|-------------|
| Participant information sheet (PIS) [Clean copy]      | 1.1            | 08 May 2018 |
| Participant information sheet (PIS) [Tracked changes] | 1.1            | 08 May 2018 |

#### **Approved documents**

The final list of approved documentation for the study is therefore as follows:

| <i>Document</i>                                                           | <i>Version</i> | <i>Date</i>   |
|---------------------------------------------------------------------------|----------------|---------------|
| Covering letter on headed paper [PROFHER 2 HRA Cover Letter]              | 1.0            | 15 March 2018 |
| GP/consultant information sheets or letters [PROFHER 2 GP Letter]         | 1.0            | 12 March 2018 |
| IRAS Application Form [IRAS_Form_16032018]                                |                | 16 March 2018 |
| Letter from funder [PROFHER 2 HTA Funding recommended letter]             |                | 08 June 2017  |
| Letters of invitation to participant [PROFHER 2 CRF Cover Letter ]        | 1.0            | 12 March 2018 |
| Letters of invitation to participant [PROFHER 2 CRF Reminder Letter]      | 1.0            | 12 March 2018 |
| Non-validated questionnaire [PROFHER 2 Participant CRF Mock Up]           | 1.0            | 12 March 2018 |
| Other [PROFHER 2 Participant Contact Details Form]                        | 1.0            | 12 March 2018 |
| Other [PROFHER Expenses Claim Form - Patient Travel]                      | 1.0            | 15 March 2018 |
| Participant consent form [PROFHER 2 - Patient Informed Consent Form]      | 1.0            | 12 March 2018 |
| Participant information sheet (PIS) [PROFHER 2 Sling Care Leaflet]        | 1.0            | 08 March 2018 |
| Participant information sheet (PIS) [Clean copy]                          | 1.1            | 08 May 2018   |
| Participant information sheet (PIS) [Tracked changes]                     | 1.1            | 08 May 2018   |
| Research protocol or project proposal [PROFHER 2 Protocol ]               | 1.0            | 09 March 2018 |
| Sample diary card/patient card [PROFHER 2 Participant Visit Diary]        | 1.0            | 12 March 2018 |
| Summary CV for Chief Investigator (CI) [A Rangan - CV 14.03.18]           |                | 14 March 2018 |
| Validated questionnaire [Validated Questionnaire - Oxford Shoulder Score] |                |               |
| Validated questionnaire [Validated Questionnaire - PROMIS Short Form]     |                |               |
| Validated questionnaire [Validated Questionnaire - EQ-5D-5L]              |                |               |

You should ensure that the sponsor has a copy of the final documentation for the study. It is the sponsor's responsibility to ensure that the documentation is made available to R&D offices at all participating sites.

**18/NE/0125**

**Please quote this number on all correspondence**

Yours sincerely

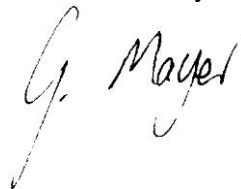

**Gillian Mayer**  
**REC Manager**

E-mail: [nrescommittee.northeast-tyneandwearsouth@nhs.net](mailto:nrescommittee.northeast-tyneandwearsouth@nhs.net)

Copy to: Mr Joe Millar – R&D Dept, South Tees Hospitals NHS Foundation Trust
